# Supplementary figures and images for: Identification of candidate genes involved in early iron deficiency chlorosis signaling in soybean (Glycine max) roots and leaves
Source: Springer Nature journal article supplement (doi:10.1186/1471-2164-15-702), 2014-08-22

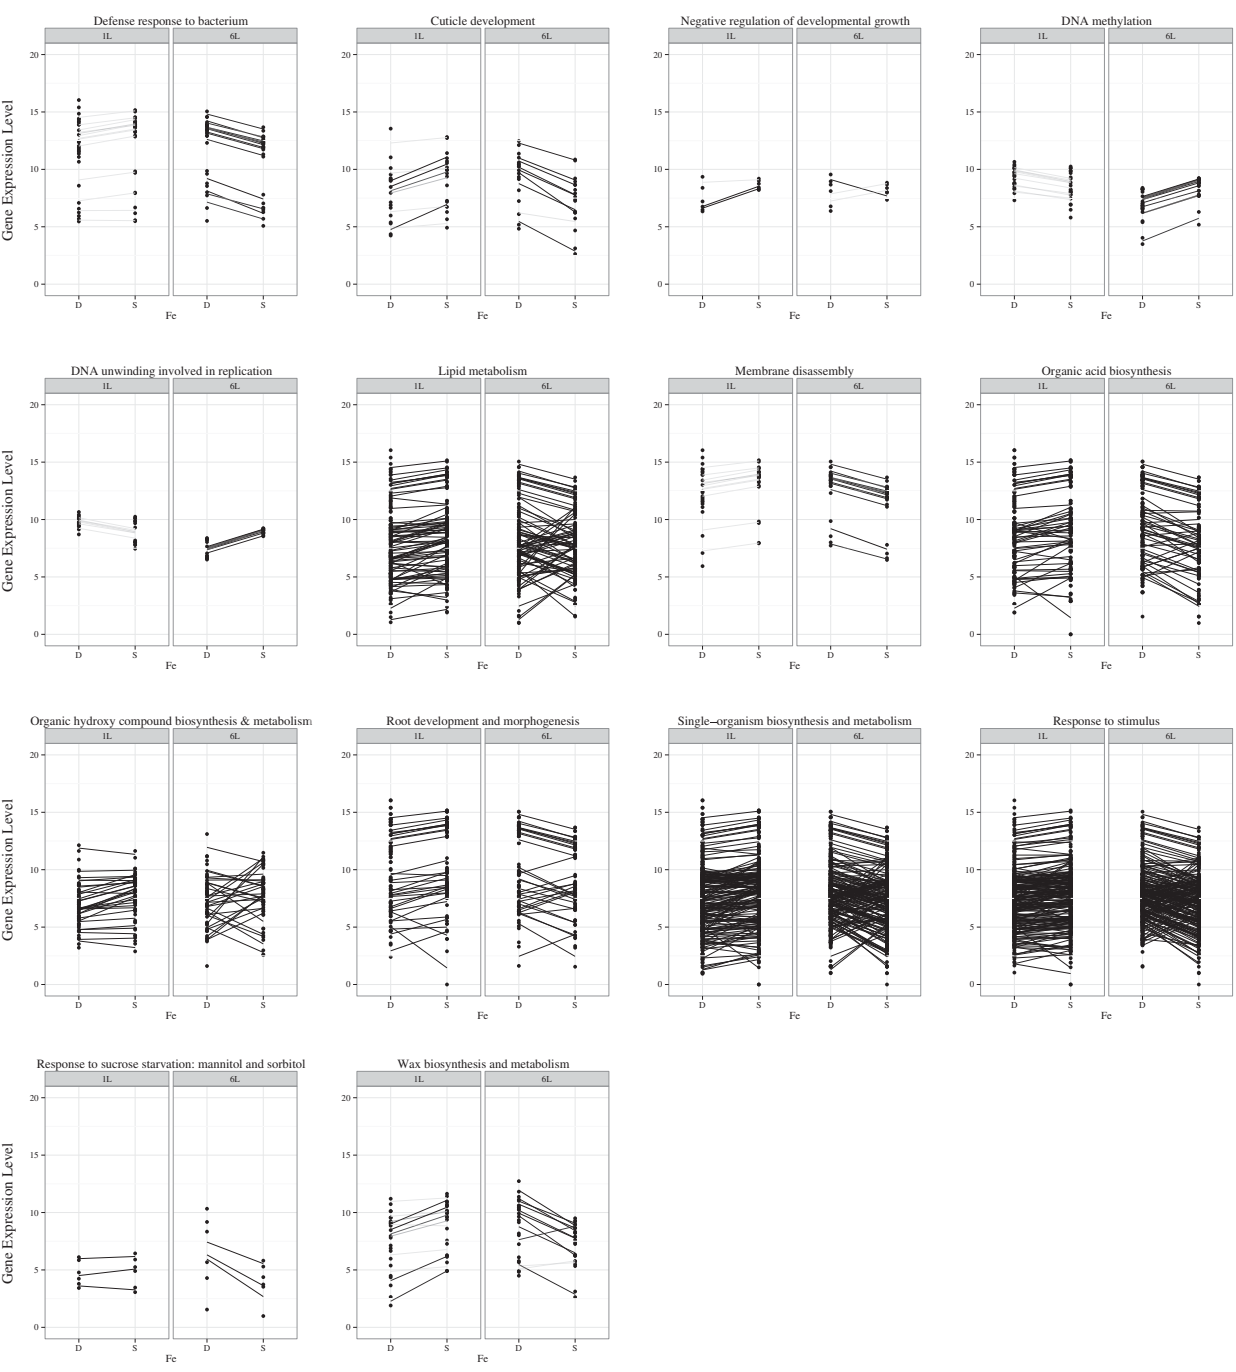

Supplement: 12864_2014_6420_MOESM17_ESM.pdf [file 12864_2014_6420_MOESM17_ESM.pdf]

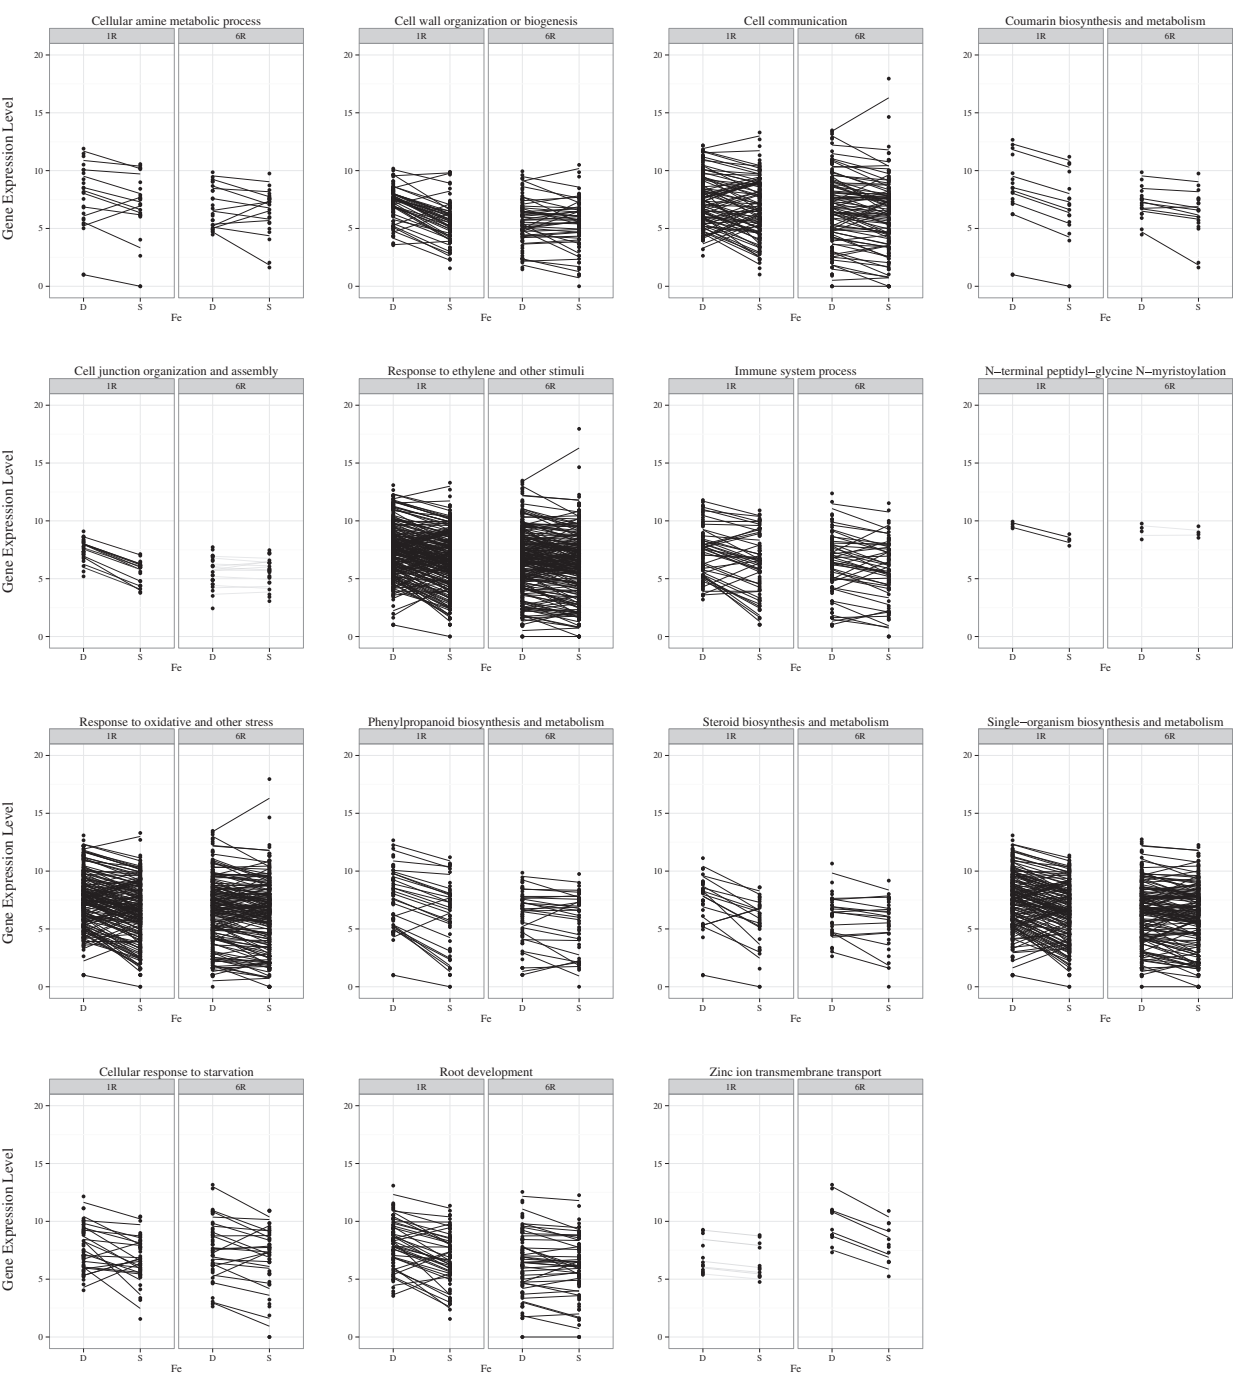

Supplement: 12864_2014_6420_MOESM18_ESM.pdf [file 12864_2014_6420_MOESM18_ESM.pdf]

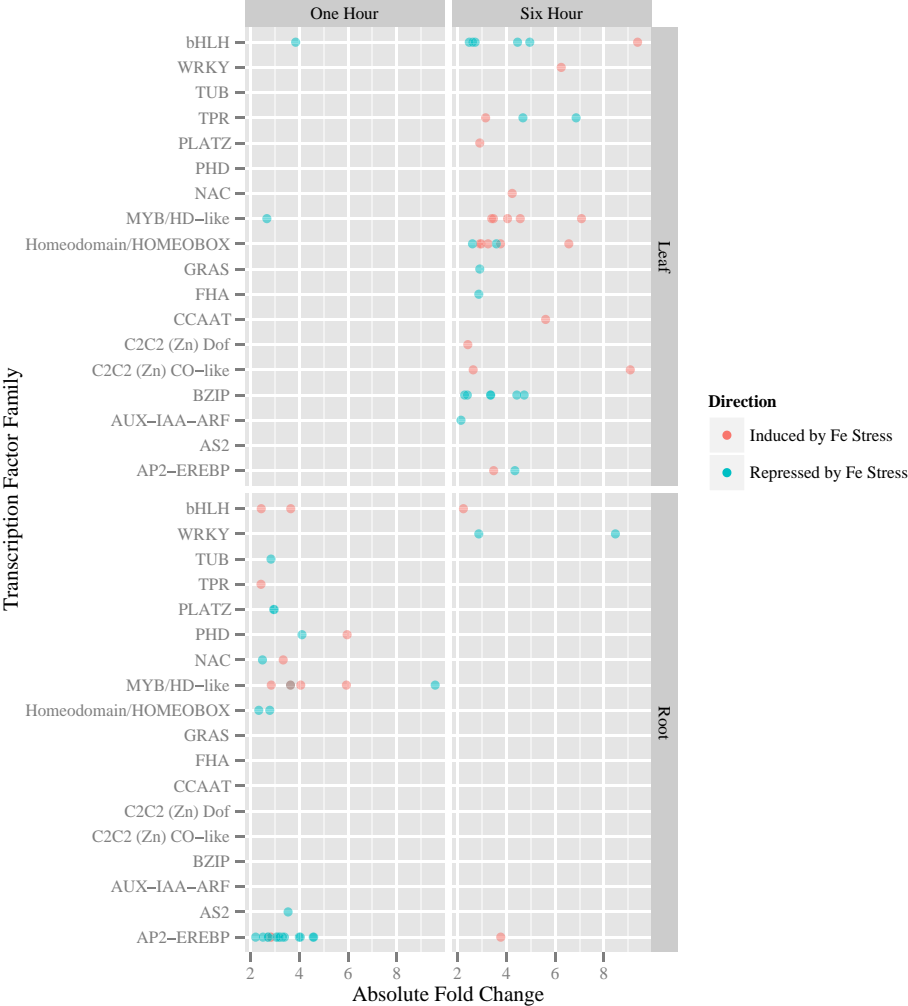

Supplement: 12864_2014_6420_MOESM19_ESM.pdf [file 12864_2014_6420_MOESM19_ESM.pdf]
